EXPRESSION OF CONCERN

# Expression of Concern: A novel image encryption technique using hybrid method of discrete dynamical chaotic maps and Brownian motion

The *PLOS One* Editors

After this article [1] was published, the following concerns were noted:

- The articles cited as Reference 3, 9 and 51 were retracted after [1] was published due to concerns about potential manipulation of the publication process.
- The article exhibits abnormal citation patterns (e.g. the citation of references [17-70] in support of a single statement).

In light of the cumulative issues, the *PLOS One* Editors issue this Expression of Concern. Readers are advised to interpret the article [1] with caution.

## Reference

1. Khan M, Masood F, Alghafis A, Amin M, Batool Naqvi SI. A novel image encryption technique using hybrid method of discrete dynamical chaotic maps and Brownian motion. *PLoS One*. 2019;14(12):e0225031. <https://doi.org/10.1371/journal.pone.0225031> PMID: [31856231](https://pubmed.ncbi.nlm.nih.gov/31856231/)

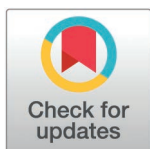

## OPEN ACCESS

**Citation:** The *PLOS One* Editors (2025) Expression of Concern: A novel image encryption technique using hybrid method of discrete dynamical chaotic maps and Brownian motion. *PLoS One* 20(12): e0339232. <https://doi.org/10.1371/journal.pone.0339232>

**Published:** December 19, 2025

**Copyright:** © 2025 The *PLOS One* Editors. This is an open access article distributed under the terms of the [Creative Commons Attribution License](https://creativecommons.org/licenses/by/4.0/), which permits unrestricted use, distribution, and reproduction in any medium, provided the original author and source are credited.
